# Supplementary material for: Neural Substrates of Treatment Response to Cognitive-Behavioral Therapy in Panic Disorder With Agoraphobia
Source: Atypon-hosted journal article supplement (doi:10.1176/appi.ajp.2013.12111484), 2013-08-28
Supplement: 1345_ds001.pdf [file 1345_ds001.pdf]

Supplemental table 1. Demographic and clinical characteristics of the sample with complete pre- and post-treatment data (t1 & t2 sample; n = 42). Means (SD) except where noted.

|                                             | All patients<br>(n = 42) | Responder<br>(n = 24) | Non-responder<br>(n = 18) | Chi <sup>2</sup> or t<br>(df) | p       |
|---------------------------------------------|--------------------------|-----------------------|---------------------------|-------------------------------|---------|
| <i>Demographic characteristics</i>          |                          |                       |                           |                               |         |
| Female gender [n(%)]                        | 29 (69.05)               | 17 (70.83)            | 12 (66.67)                | 0.084 (1)                     | 0.773   |
| Years of education                          |                          |                       |                           |                               |         |
| 8                                           | 4 (9.52)                 | 1 (4.17)              | 3 (16.67)                 |                               |         |
| 10                                          | 18 (42.86)               | 11 (45.83)            | 7 (38.89)                 |                               |         |
| 12-13                                       | 20 (47.62)               | 12 (50.00)            | 8 (44.45)                 | 1.870 (2)                     | 0.393   |
| Age (years)                                 | 34.83 (10.15)            | 33.17 (11.24)         | 37.06 (8.28)              | 1.292 (40)                    | 0.204   |
| <i>Clinical characteristics at baseline</i> |                          |                       |                           |                               |         |
| Therapist-guided CBT arm [n (%)]            | 22 (52.38)               | 11 (45.83)            | 11 (61.11)                | 0.963 (1)                     | 0.327   |
| Comorbid depression [n (%)] <sup>1</sup>    | 15 (35.71)               | 8 (33.33)             | 7 (38.88)                 | 0.138 (1)                     | 0.710   |
| Number of diagnoses                         | 2.50 (1.35)              | 2.38 (1.31)           | 2.67 (1.41)               | 0.689 (40)                    | 0.495   |
| CGI                                         | 5.36 (0.62)              | 5.38 (0.65)           | 5.33 (0.59)               | -0.214 (40)                   | 0.832   |
| SIGH-A total                                | 24.38 (5.41)             | 24.17 (5.51)          | 24.67 (5.41)              | 0.293 (40)                    | 0.771   |
| PAS total                                   | 25.97 (8.69)             | 21.62 (7.74)          | 31.78 (6.22)              | 4.565 (40)                    | < 0.001 |
| ASI total                                   | 31.10 (9.37)             | 32.88 (8.31)          | 28.72 (10.39)             | -1.440 (40)                   | 0.158   |
| BDI II total                                | 17.26 (9.28)             | 17.42 (10.14)         | 17.06 (8.28)              | -0.123 (40)                   | 0.903   |
| <i>Clinical characteristics at post</i>     |                          |                       |                           |                               |         |
| CGI                                         | 3.55 (1.04)              | 3.17 (1.09)           | 4.06 (0.73)               | 2.993 (40)                    | 0.005   |
| SIGH-A total                                | 12.36 (6.90)             | 7.88 (3.53)           | 18.33 (5.65)              | 6.910 (27)                    | < 0.001 |
| PAS total                                   | 13.95 (8.57)             | 9.03 (5.54)           | 20.52 (7.47)              | 5.731 (40)                    | < 0.001 |
| ASI total                                   | 15.48 (8.60)             | 13.42 (7.92)          | 18.22 (8.92)              | 1.843 (40)                    | 0.073   |
| BDI II total                                | 9.05 (7.69)              | 6.33 (5.75)           | 12.67 (8.58)              | 2.863 (40)                    | 0.007   |
| <i>Neuropsychological characteristics</i>   |                          |                       |                           |                               |         |

|                          |       |         |       |         |       |         |             |       |
|--------------------------|-------|---------|-------|---------|-------|---------|-------------|-------|
| Digit span forward task  | 7.81  | (1.98)  | 8.13  | (1.90)  | 7.39  | (2.06)  | -1.200 (40) | 0.237 |
| Digit span backward task | 7.26  | (1.95)  | 7.54  | (2.08)  | 6.89  | (1.75)  | -1.075 (40) | 0.289 |
| TMT-A (sec)              | 25.60 | (8.38)  | 25.44 | (8.68)  | 25.82 | (8.21)  | 0.145 (40)  | 0.885 |
| TMT-B (sec)              | 55.40 | (16.14) | 53.63 | (14.84) | 57.76 | (17.89) | 0.817 (40)  | 0.419 |

---

CGI: Clinical Global Impression Scale; SIGH-A: Hamilton Anxiety Scale; PAS: Panic and Agoraphobia Scale; ASI: Anxiety Sensitivity Index;  
BDI II: Beck Depression Inventory II; TMT-A: Trail Making Test A; TMT-B: Trail Making Test B

<sup>1</sup>depressive disorders encompassing major depression and dysthymia

Supplemental table 2. Brain activation clusters during fear conditioning and extinction characterizing treatment response at baseline (t1) in the refined sample of n = 42 patients for which complete pre- and post-treatment data were available (t1 & t2 sample).

| Contrast/Region                       | Side | Voxels | x   | y   | z   | t    | p<br>uncorr.               |
|---------------------------------------|------|--------|-----|-----|-----|------|----------------------------|
| <b>Differences at baseline (t1)</b>   |      |        |     |     |     |      |                            |
| Extinction phase                      |      |        |     |     |     |      |                            |
| R (CS+>CS-) > NR (CS+>CS-)            |      |        |     |     |     |      |                            |
| Middle temporal gyrus                 | L    | 702    | -46 | -46 | 10  | 4.06 | < 0.001                    |
| Pre-/postcentral gyrus                | R    | 732    | 60  | -10 | 42  | 3.91 | <0.001                     |
| Anterior cingulate gyrus <sup>1</sup> | R    | 166    | 22  | 42  | 0   | 3.56 | <0.001                     |
| Hippocampus (ROI analysis)            | R    | 6      | 40  | -14 | -14 | 3.23 | 0.044 <sup>§</sup>         |
| Amygdala (ROI analysis)               | R    | 2      | 30  | 4   | -26 | 2.82 | 0.042 <sup>§</sup>         |
| NR (CS+>CS-) > R (CS+>CS-)            |      |        |     |     |     |      | No differential activation |

R: responders; NR: non-responders; L: left; R: right; CS+: stimulus associated with the unconditioned stimulus (unpaired); CS-: CS not associated with the unconditioned stimulus; voxel: number of voxels per cluster; x, y, z: MNI coordinates; p < 0.005 (uncorr.) with a minimum cluster size of 142 contiguous voxels, indicating to correct for multiple comparisons at p < 0.05. Region-of-Interest (ROI) analysis on the amygdala and hippocampus: p < 0.05, FWE corr.

<sup>1</sup>Cluster encompassing the anterior cingulate, medial and superior orbitofrontal gyrus, and middle, superior and superior medial frontal gyrus with the peak voxel deviating 2.83 mm from the anterior cingulate gyrus.

<sup>§</sup> FWE corrected p value
